# Supplementary material
Source: PubMed Central journal article supplement (PMC6166671)
Supplement: 138316_1_supp_162243_pb8nk7.pdf [file 138316_1_supp_162243_pb8nk7.pdf]

## Supplemental Data

### **Reactive Metabolite Induced Protein Glutathionylation Mechanistically Accounts for Acetaminophen Hepatotoxicity**

#### **This file includes:**

- Supplemental Figure S1: Biochemical analyses of APAP-treated HepaRG cells.
- Supplemental Figure S2: Molecular dynamics simulations of the effects of glutathionylation on VDAC1.
- Supplemental Table S1: Compound-dependent MS parameters for CPT1 assay analytes.
- Supplemental Table S2: Glutathionylation profile of proteins involved in energy metabolism as a function of time.
- Supplemental Table S3: Glutathionylation profile of proteins involved in protein turnover as a function of time.
- Supplemental Table S4: Glutathionylation profile of proteins involved in defense against cellular stress as a function of time.
- Supplemental Table S5: Glutathionylation profile of proteins involved in calcium dynamics and the mitochondrial permeability transition pore formation as a function of time.
- Supplemental Table S6: Summarized reports of APAP-induced metabolic perturbations from literature and in-house data.
- Supplemental Table S7: List of proteins known to be covalently adducted by APAP. Proteins that are also glutathionylated in our dataset are listed in bold.
- Supplemental Video 1: Simulation of open and closed VDAC1 conformations.
- Supplemental Video 2: Simulation of enhanced VDAC1 permeability to small molecules and ions following glutathionylation.
- Raw peptide data: 0.5 mM APAP\_3h\_1, 0.5 mM APAP\_3h\_2, 0.5 mM APAP\_3h\_3, 0.5 mM APAP+DEDC\_3h\_1, 0.5 mM APAP+DEDC\_3h\_2, 0.5 mM APAP+DEDC\_3h\_3, 30 mM APAP\_3h\_1, 30 mM APAP\_3h\_2, 30 mM APAP\_3h\_3, 30 mM APAP\_6h\_1, 30 mM APAP\_6h\_2, 30 mM APAP\_6h\_3, 30 mM APAP\_12h\_1, 30 mM APAP\_12h\_2, 30 mM APAP\_12h\_3, 30 mM APAP\_24h\_1, 30 mM

APAP\_24h\_2, 30 mM APAP\_24h\_3, Veh ctrl\_1, Veh ctrl\_2, Veh ctrl\_3, Masterlist of peptide IDs (final).

Processed peptide data:

0.5 mM APAP 3h divided by veh ctrl\_HL ratio, 0.5 mM APAP+DEDIC 3h divided by veh ctrl\_HL ratio, 30 mM APAP 3h divided by veh ctrl\_HL ratio, 30 mM APAP 6h divided by veh ctrl\_HL ratio, 30 mM APAP 12h divided by veh ctrl\_HL ratio, 30 mM APAP 24h divided by veh ctrl\_HL ratio, Veh ctrl averaged.

Supplemental References

**a**

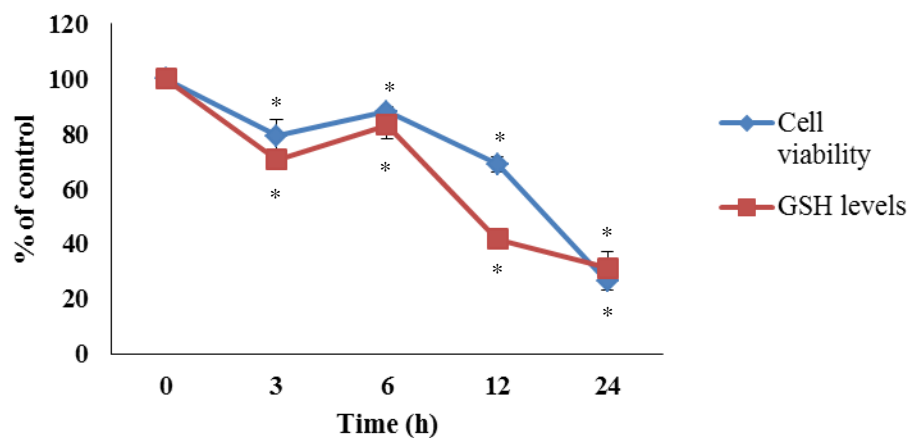

**b**

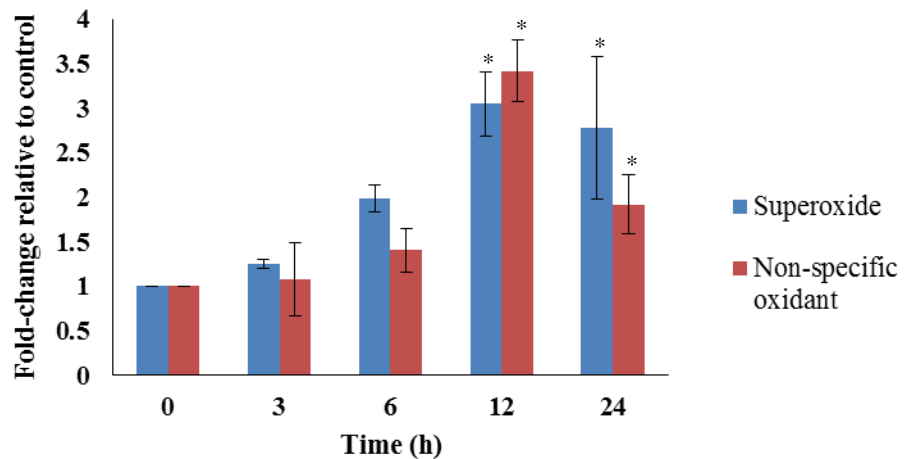

SUPPLEMENTAL FIG. S1. **Biochemical analyses of APAP-treated HepaRG cells.** Time-course of (A) cell viability and GSH levels and (B) superoxide and non-specific oxidant formation in HepaRG cells exposed to 30 mM APAP over 24 h. \*  $p < 0.05$  compared to the control. Error bars indicate standard deviations.

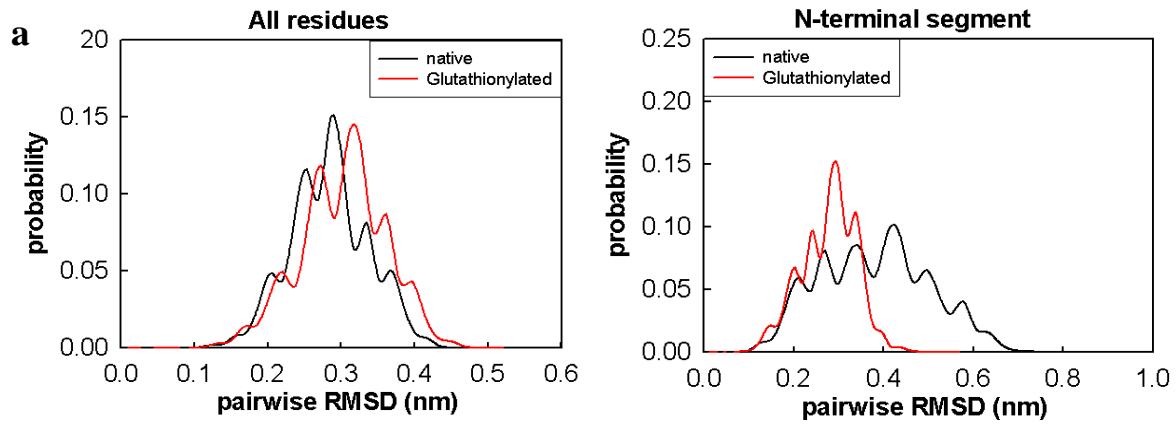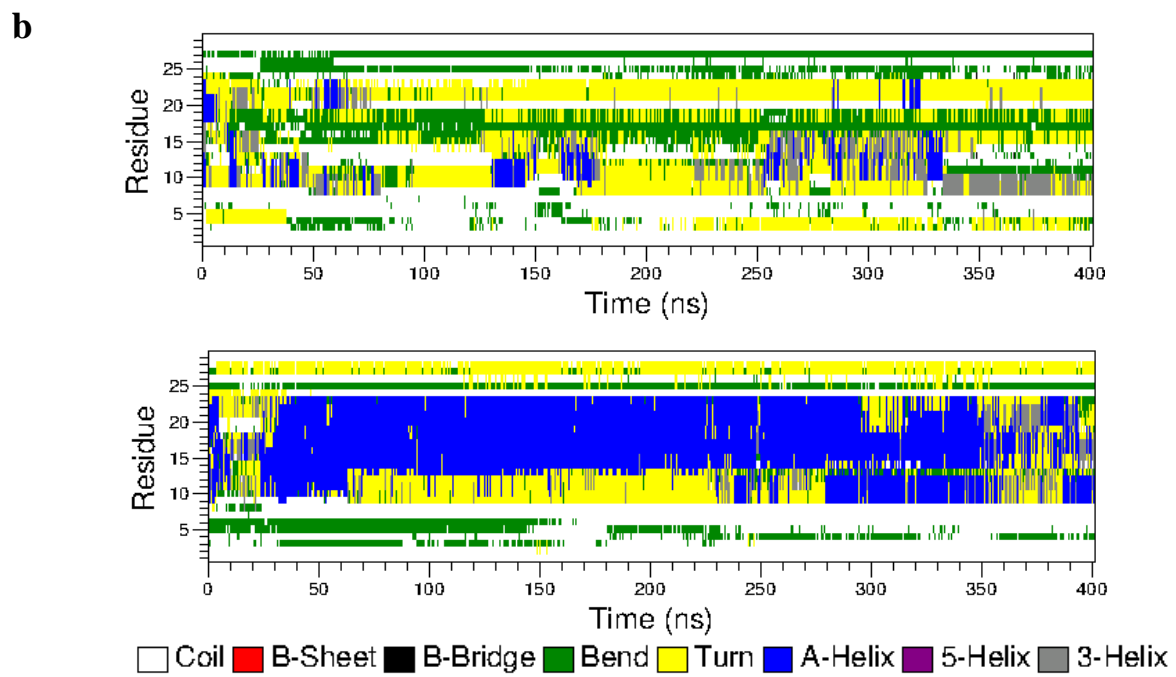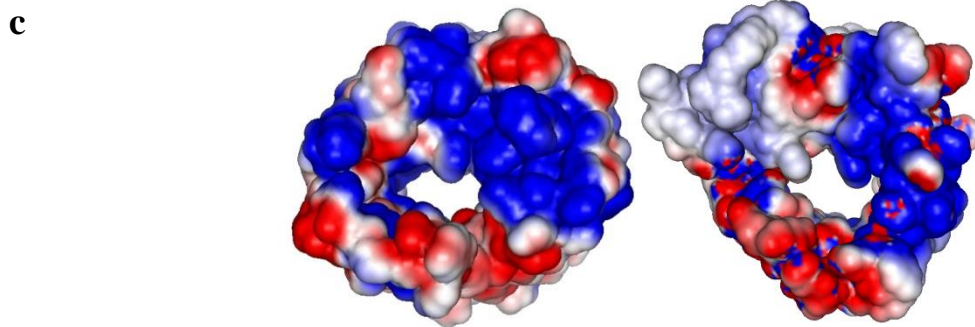

**SUPPLEMENTAL FIG. S2. Molecular dynamics simulations of the effects of glutathionylation on VDAC1.** (A) Pairwise RMSD distribution for the whole protein and the N-terminal segment of both native and glutathionylated VDAC1. (B) Secondary structure evolution of the N-terminal segment of the native and glutathionylated VDAC1. (C) The electrostatic potential map of native (left) and glutathionylated (right) VDAC1. Red region denotes negative electrostatic potential while blue region denotes positive potential.

SUPPLEMENTAL TABLE S1. Compound-dependent MS parameters for CPT1 assay analytes.

| <b>Analyte</b>         | <b>MRM<br/>Transition<br/>(<i>m/z</i>)</b> | <b>Collision<br/>Energy<br/>(V)</b> | <b>Declustering<br/>Potential<br/>(V)</b> | <b>Entrance<br/>Potential<br/>(V)</b> | <b>Collision<br/>Exit<br/>Potential<br/>(V)</b> |
|------------------------|--------------------------------------------|-------------------------------------|-------------------------------------------|---------------------------------------|-------------------------------------------------|
| Palmitoyl<br>carnitine | 400 → 85                                   | 45                                  | 125                                       | 12                                    | 8                                               |
| Ketoconazole           | 531 → 489                                  | 44                                  | 120                                       | 9                                     | 11                                              |

SUPPLEMENTAL TABLE S2. Glutathionylation profile of proteins involved in energy metabolism as a function of time. Values in red represent the average H:L fold-change of peptides normalized to the control that exceed a 1.5-fold threshold across at least 2 replicates.

| Pathway                                               | Accession | Description                                                                       | Gene Symbol | Peptide                                    | H:L fold-change across time (h) |                      |                      |                      |
|-------------------------------------------------------|-----------|-----------------------------------------------------------------------------------|-------------|--------------------------------------------|---------------------------------|----------------------|----------------------|----------------------|
|                                                       |           |                                                                                   |             |                                            | 3                               | 6                    | 12                   | 24                   |
| Glycolysis                                            | P30153    | Serine/threonine-protein phosphatase 2A 65 kDa regulatory subunit A alpha isoform | 2AAA        | EFCENLSADCR<br>LNIISNLDCVNEVIGIR           | 1.35<br>1.08                    | -<br>1.71            | 1.14<br>1.24         | 2.49<br>0.86         |
|                                                       | Q14738    | Serine/threonine-protein phosphatase 2A 56 kDa regulatory subunit delta isoform   | 2A5D        | CVSSPHFQVAER                               | 1.70                            | -                    | 1.12                 | -                    |
|                                                       | P04075    | Fructose-bisphosphate aldolase A                                                  | ALDOA       | ALANSLACQGK                                | 1.96                            | 0.79                 | 0.94                 | 1.08                 |
|                                                       | P60174    | Triosephosphate isomerase                                                         | TPIS        | IAVAAQNCYK                                 | 1.76                            | 1.62                 | 0.98                 | 0.84                 |
|                                                       | P00558    | Phosphoglycerate kinase 1                                                         | PGK1        | ACANPAAGSVILLENLR                          | 1.26                            | 0.89                 | 1.01                 | 36.18                |
|                                                       | P06733    | Alpha-enolase                                                                     | ENOA        | QIGSVTESLQACK                              | 9.70                            | 7.15                 | 5.49                 | 0.07                 |
|                                                       | P14618    | Pyruvate kinase PKM                                                               | KPYM        | AAMADTFLEHMCR<br>GIFPVLCK<br>NTGIICTIGPASR | 0.90<br>0.99<br>1.65            | 1.60<br>1.74<br>0.85 | 1.17<br>1.07<br>0.96 | 0.50<br>0.59<br>1.08 |
| Import of palmitoyl-CoA into the mitochondrial matrix | O43772    | Mitochondrial carnitine/acylcarnitine carrier protein                             | MCAT        | CLLQIQASSGESK                              | 8.76                            | 0.93                 | 1.13                 | 0.99                 |
|                                                       | P50416    | Carnitine O-palmitoyltransferase 1, liver isoform                                 | CPT1A       | FCLTYEASMTR                                | 6.17                            | -                    | 0.04                 | 0.04                 |
| Mitochondrial fatty acid $\beta$ -oxidation           | P28330    | Long-chain specific acyl-CoA dehydrogenase, mitochondrial                         | ACADL       | AFVDNCLQLHEAK                              | 1.35                            | 1.89                 | 1.41                 | -                    |
|                                                       | P49748    | Very long-chain specific acyl-CoA dehydrogenase, mitochondrial                    | ACADV       | CLTEPSSGSDAASIR<br>GLQVPSELGGVGLCNTQYAR    | 3.15<br>2.33                    | 3.44<br>1.21         | 2.47<br>1.43         | 1.27<br>1.18         |
|                                                       | P55084    | Trifunctional enzyme subunit beta, mitochondrial                                  | ECHB        | FNNWGGSLSLGHPFGATGCR                       | 3.07                            | -                    | 2.97                 | -                    |
|                                                       | P30084    | Enoyl-CoA hydratase, mitochondrial                                                | ECHM        | ALNALCDGLIDELNQALK                         | 1.63                            | 0.93                 | 1.06                 | 0.71                 |
|                                                       | Q16698    | 2,4-Dienoyl-CoA reductase, mitochondrial                                          | DECR        | VHAIQCDVRDPDMVQNTVSELI<br>K                | 2.12                            | 2.14                 | 2.11                 | 1.16                 |
| Pyruvate metabolism                                   | P05165    | Propionyl-CoA carboxylase alpha chain, mitochondrial                              | PCCA        | MADEAVCVGPAPTSK                            | 2.72                            | 1.39                 | 1.60                 | 0.98                 |
|                                                       | P05166    | Propionyl-CoA carboxylase beta chain, mitochondrial                               | PCCB        | AFENDVDALCNLR<br>CADFGMAADK                | 5.56<br>1.74                    | 5.62<br>0.99         | -<br>0.87            | -<br>1.42            |
|                                                       | Q96PE7    | Methylmalonyl-CoA epimerase, mitochondrial                                        | MCEE        | DCGGVLVELEQA                               | 85.5                            | -                    | 1.00                 | -                    |
|                                                       | P09622    | Dihydrolipoyl dehydrogenase, mitochondrial                                        | DLDH        | ILGPGAGEMVNEAALALEYGAS<br>CEDIAR           | 3.26                            | 2.92                 | 2.64                 | -                    |

| Pathway                                       | Accession                                                               | Description                                                                                             | Gene Symbol | Peptide                                          | H:L fold-change across time (h) |           |              |              |
|-----------------------------------------------|-------------------------------------------------------------------------|---------------------------------------------------------------------------------------------------------|-------------|--------------------------------------------------|---------------------------------|-----------|--------------|--------------|
|                                               |                                                                         |                                                                                                         |             |                                                  | 3                               | 6         | 12           | 24           |
|                                               | P08559                                                                  | Pyruvate dehydrogenase E1 component subunit alpha, somatic form, mitochondrial                          | ODPA        | VDGMDILCVR                                       | 2.74                            | 1.24      | 1.60         | 1.05         |
|                                               | P10515                                                                  | Dihydrolipoylysine-residue acetyltransferase component of pyruvate dehydrogenase complex, mitochondrial | ODP2        | ASALACLK                                         | 2.73                            | 2.58      | 1.13         | 0.51         |
|                                               | O75390                                                                  | Citrate synthase, mitochondrial                                                                         | CISY        | LPCVAAK                                          | 5.94                            | 1.28      | 1.46         | 1.79         |
|                                               | Q99798                                                                  | Aconitate hydratase, mitochondrial                                                                      | ACON        | CTTDHISAAGPWLK                                   | 1.63                            | 1.45      | 1.38         | 0.85         |
|                                               | P51553                                                                  | Isocitrate dehydrogenase [NAD] subunit gamma, mitochondrial                                             | IDH3G       | HACVPVDFEEVHVSSNADEEDIR                          | 1.11                            | 1.59      | 0.94         | 1.03         |
|                                               | P48735                                                                  | Isocitrate dehydrogenase [NADP], mitochondrial                                                          | IDHP        | DLAGCIHGLSNVK                                    | 1.34                            | 1.87      | 1.46         | 1.24         |
|                                               | P50213                                                                  | Isocitrate dehydrogenase [NAD] subunit alpha, mitochondrial                                             | IDH3A       | CSDFTEEICR                                       | 1.93                            | 0.03      | 0.99         | 2.04         |
|                                               | Q02218                                                                  | 2-Oxoglutarate dehydrogenase, mitochondrial                                                             | ODO1        | DVVVDLVCYR                                       | 1.90                            | 3.06      | 1.18         | 1.27         |
| Citric acid cycle                             | P09622                                                                  | Dihydrolipoyl dehydrogenase, mitochondrial                                                              | DLDH        | CSTPGNFFHVLR<br>ILGPGAGEMVNEAALALEYGAS<br>CEDIAR | 3.62<br>3.26                    | -<br>2.92 | -<br>2.64    | -<br>-       |
|                                               | P53597                                                                  | Succinyl-CoA ligase [ADP/GDP-forming] subunit alpha, mitochondrial                                      | SUCA        | IICQGFTGK<br>LIGNPCPGVINPGECK                    | 1.30<br>1.63                    | 1.00<br>- | 1.19<br>1.09 | 2.47<br>0.29 |
|                                               | P31040                                                                  | Succinate dehydrogenase [ubiquinone] flavoprotein subunit, mitochondrial                                | SDHA        | GLSEAGFNTACVTK<br>GVIALCIEDGSIHR                 | 1.86<br>1.23                    | -<br>1.78 | 1.73<br>1.00 | 1.15<br>0.37 |
|                                               | P21912                                                                  | Succinate dehydrogenase [ubiquinone] iron-sulfur subunit, mitochondrial                                 | SDHB        | CGPMVLDALIK                                      | 2.24                            | 3.92      | 1.85         | 0.82         |
|                                               | Q99643                                                                  | Succinate dehydrogenase cytochrome b560 subunit, mitochondrial                                          | C560        | SLCLGPALHTAK                                     | 1.21                            | 2.46      | 1.68         | 1.06         |
|                                               | P40926                                                                  | Malate dehydrogenase, mitochondrial                                                                     | MDHM        | GCDVVVIPAGVPR                                    | 2.49                            | 1.33      | 1.14         | 1.30         |
|                                               | P28331                                                                  | NADH-ubiquinone oxidoreductase 75 kDa subunit, mitochondrial                                            | NDUS1       | DCFIIYQGHGHDVVGAPIADVILPG<br>AAYTEK              | 1.85                            | 1.14      | -            | 1.26         |
|                                               | O95299                                                                  | NADH dehydrogenase [ubiquinone] 1 alpha subcomplex subunit 10, mitochondrial                            | NDUAA       | CEVLQYSAR                                        | 2.32                            | -         | 1.29         | -            |
|                                               | P49821                                                                  | NADH dehydrogenase [ubiquinone] flavoprotein 1, mitochondrial                                           | NDUV1       | GAGAYICGEETALIESIEGK                             | 1.99                            | 1.94      | 8.73         | -            |
|                                               | P31040                                                                  | Succinate dehydrogenase [ubiquinone] flavoprotein subunit, mitochondrial                                | SDHA        | GLSEAGFNTACVTK<br>GVIALCIEDGSIHR                 | 1.86<br>1.23                    | -<br>1.78 | 1.73<br>1.00 | 1.15<br>0.37 |
| P21912                                        | Succinate dehydrogenase [ubiquinone] iron-sulfur subunit, mitochondrial | SDHB                                                                                                    | CGPMVLDALIK | 2.24                                             | 3.92                            | 1.85      | 0.82         |              |
| Respiratory electron transport, ATP synthesis |                                                                         |                                                                                                         |             |                                                  |                                 |           |              |              |
|                                               |                                                                         |                                                                                                         |             |                                                  |                                 |           |              |              |
|                                               |                                                                         |                                                                                                         |             |                                                  |                                 |           |              |              |
|                                               |                                                                         |                                                                                                         |             |                                                  |                                 |           |              |              |
|                                               |                                                                         |                                                                                                         |             |                                                  |                                 |           |              |              |
|                                               |                                                                         |                                                                                                         |             |                                                  |                                 |           |              |              |



| Pathway                          | Accession | Description                                                             | Gene Symbol | Peptide                                                    | H:L fold-change across time (h) |                      |                      |                       |
|----------------------------------|-----------|-------------------------------------------------------------------------|-------------|------------------------------------------------------------|---------------------------------|----------------------|----------------------|-----------------------|
|                                  |           |                                                                         |             |                                                            | 3                               | 6                    | 12                   | 24                    |
|                                  | Q99643    | Succinate dehydrogenase cytochrome b560 subunit, mitochondrial          | C560        | SLCLGPALIHTAK                                              | 1.21                            | 2.46                 | 1.68                 | 1.06                  |
|                                  | P31930    | Cytochrome b-c1 complex subunit 1, mitochondrial                        | QCR1        | NALVSHLDGTTTPCEDIGR<br>SICYAETGLLGAHFVCDR                  | 1.38<br>5.21                    | 1.00<br>-            | 1.22<br>1.44         | 2.12<br>0.93          |
|                                  | P22695    | Cytochrome b-c1 complex subunit 2, mitochondrial                        | QCR2        | ENMAYTVECLR<br>NALANPLYCPDYR                               | 2.53<br>2.98                    | 2.34                 | 2.00<br>1.20         | 2.55<br>5.83          |
|                                  | P08574    | Cytochrome c1, heme protein, mitochondrial                              | CY1         | HLVGVCYTEDEAK                                              | 1.16                            | 1.88                 | 0.78                 | 0.43                  |
|                                  | P24539    | ATP synthase F(0) complex subunit B1, mitochondrial                     | AT5F1       | CIADLK                                                     | 1.88                            | 1.47                 | 1.39                 | -                     |
|                                  | P13804    | Electron transfer flavoprotein subunit alpha, mitochondrial             | ETFA        | LGGEVSCLVAGTK<br>TIYAGNALCTVK                              | 0.94<br>3.90                    | 1.03<br>1.20         | 1.45<br>2.59         | 2.98<br>1.32          |
|                                  | P38117    | Electron transfer flavoprotein subunit beta                             | ETFB        | HSMNPFCEIAVEEAVR                                           | 1.26                            | 1.34                 | 1.39                 | 2.09                  |
|                                  | Q16134    | Electron transfer flavoprotein-ubiquinone oxidoreductase, mitochondrial | ETFD        | QNVAVNELCGR                                                | 1.25                            | 8.49                 | 1.23                 | -                     |
|                                  | P42704    | Leucine-rich PPR motif-containing protein, mitochondrial                | LPPRC       | FCPAGVYEFVPEQGDGFR<br>LEDVALQILLACPVSK<br>LIASYCNVGDIEGASK | 105<br>1.05<br>1.61             | 131<br>1.89<br>1.10  | 117<br>1.63<br>1.33  | 137<br>1.38<br>1.18   |
|                                  | P00505    | Aspartate aminotransferase, mitochondrial                               | AATM        | TCGFDFGTGAVEDISK<br>VGAFTMVCK<br>ACANPAAGSVILLENLR         | 2.88<br>2.20<br>1.26            | 1.02<br>1.17<br>0.89 | 0.95<br>0.66<br>1.01 | 0.48<br>0.70<br>36.18 |
|                                  | Q16822    | Phosphoenolpyruvate carboxykinase [GTP], mitochondrial                  | PCKGM       | YVAAAFPSACGK                                               | 0.99                            | 1.17                 | 1.83                 | 3.21                  |
| <b>Gluconeogenesis</b>           | P40925    | Malate dehydrogenase, cytoplasmic                                       | MDHC        | MGVLDGVLMELQDCALPLLK<br>GCDVVVIPAGVPR                      | 7.25<br>2.49                    | -<br>1.33            | 6.29<br>1.14         | -<br>1.30             |
|                                  | P04075    | Fructose-bisphosphate aldolase A                                        | ALDOA       | ALANSLACQGK                                                | 1.96                            | 0.79                 | 0.94                 | 1.08                  |
|                                  | P06733    | Alpha-enolase                                                           | ENOA        | QIGSVTESLQACK                                              | 9.70                            | 7.15                 | 5.49                 | 0.07                  |
|                                  | P00558    | Phosphoglycerate kinase 1                                               | PGK1        | ACANPAAGSVILLENLR                                          | 1.26                            | 0.89                 | 1.01                 | 36.18                 |
|                                  | P11498    | Pyruvate carboxylase, mitochondrial                                     | PYC         | GLYAAFDCTATMK                                              | 4.96                            | 3.14                 | 3.48                 | 4.84                  |
|                                  | P53007    | Tricarboxylate transport protein, mitochondrial                         | TXTP        | GIGDCVR                                                    | 1.48                            | 1.59                 | 1.14                 | 0.80                  |
|                                  | P40926    | Malate dehydrogenase, mitochondrial                                     | MDHM        | GCDVVVIPAGVPR                                              | 2.49                            | 1.33                 | 1.14                 | 1.30                  |
|                                  | P60174    | Triosephosphate isomerase                                               | TPIS        | IAVAAQNCYK                                                 | 1.76                            | 1.62                 | 0.98                 | 0.84                  |
|                                  | P11413    | Glucose-6-phosphate 1-dehydrogenase                                     | G6PD        | DNIACVILTFK<br>DVMQNHLQLMLCL<br>LILDVFCGSQMHF              | 3.47<br>2.88<br>2.33            | 1.96<br>1.26<br>1.09 | 1.27<br>1.01<br>1.34 | 0.84<br>1.45<br>0.92  |
| <b>Pentose phosphate pathway</b> | P52209    | 6-Phosphogluconate dehydrogenase, decarboxylating                       | 6PGD        | MVHNGIEYGDMLICEAYHLMK<br>SAVENCQDSWR                       | 6.29<br>1.77                    | -<br>2.05            | 9.79<br>1.50         | -<br>0.97             |

| Pathway                     | Accession | Description                                     | Gene Symbol                         | Peptide               | H:L fold-change across time (h) |      |      |      |      |
|-----------------------------|-----------|-------------------------------------------------|-------------------------------------|-----------------------|---------------------------------|------|------|------|------|
|                             |           |                                                 |                                     |                       | 3                               | 6    | 12   | 24   |      |
| Fatty acyl-CoA biosynthesis | P29401    | Transketolase                                   | TKT                                 | CSTFAAFFTR            | 2.24                            | 0.98 | 1.06 | 1.31 |      |
|                             |           |                                                 |                                     | AIIVDGHSVEELCK        | 1.92                            | 3.77 | 1.18 | 0.68 |      |
|                             | P37837    | Transaldolase                                   | TALDO                               | ALAGCDFLTISPK         | 1.76                            | 2.10 | 1.10 | 0.66 |      |
|                             | P49327    | Fatty acid synthase                             | FAS                                 | AALQEELQLCK           | 1.09                            | 1.82 | 1.14 | 2.34 |      |
|                             |           |                                                 |                                     | AAPLDSIHSLAAYYIDCIR   | 3.06                            | 4.64 | 2.65 | 2.78 |      |
|                             |           |                                                 |                                     | ACLDTAVENMPSLK        | 15.8                            | 5.37 | 0.98 | 1.21 |      |
|                             |           |                                                 |                                     | AINCATSGVVGLVNCLR     | 4.68                            | 0.09 | 0.48 | 0.09 |      |
|                             |           |                                                 |                                     | CTVFHGAQVEDAFR        | 1.72                            | 1.54 | 1.16 | 0.96 |      |
|                             |           |                                                 |                                     | LSIPTYGLQCTR          | 2.79                            | 1.30 | 0.95 | 1.41 |      |
|                             |           |                                                 |                                     | MASCLEVLDLFLNQPH      | 1.53                            | 3.60 | 1.15 | 1.18 |      |
|                             |           |                                                 |                                     | SFYGSTLFLCR           | 1.06                            | 1.52 | 0.98 | 1.31 |      |
|                             |           |                                                 |                                     | TGGAYGEDLGADYNLSQVCDG | 2.85                            | 2.07 | 2.40 | 0.04 |      |
|                             |           |                                                 |                                     | K                     |                                 |      |      |      |      |
|                             |           | P33121                                          | Long-chain-fatty-acid--CoA ligase 1 | ACSL1                 | AAEGEGEVCVK                     | 1.17 | 1.35 | 1.14 | 1.94 |
|                             |           |                                                 |                                     |                       | CGVEVTSMK                       | 1.73 | 1.02 | 1.22 | 1.95 |
|                             |           |                                                 |                                     |                       | GFEGSFEELCR                     | 2.12 | 2.16 | 1.39 | 1.31 |
|                             |           |                                                 |                                     |                       | GIQVSNNGPCLGSR                  | 2.61 | 1.39 | 1.33 | 3.57 |
|                             |           |                                                 |                                     | LIAIVVPDVETLCSWAQK    | 2.42                            | 3.07 | 1.59 | 1.24 |      |
|                             | O95573    | Long-chain-fatty-acid--CoA ligase 3             | ACSL3                               | NTPLCDSFVFR           | 3.30                            | 1.36 | 1.21 | 1.48 |      |
|                             | O60488    | Long-chain-fatty-acid--CoA ligase 4             | ACSL4                               | TALLDISCVK            | 1.12                            | 1.63 | 1.39 | 1.39 |      |
|                             | Q9ULC5    | Long-chain-fatty-acid--CoA ligase 5             | ACSL5                               | GLAVSDNGPCLGYR        | 1.14                            | 1.09 | 1.65 | 2.39 |      |
|                             |           |                                                 |                                     | IVQAVVYSCGAR          | 1.40                            | 1.43 | 1.37 | 2.38 |      |
|                             | P53396    | ATP-citrate synthase                            | ACLY                                | AVQGMLDFDYVCSR        | 1.02                            | 1.13 | 1.26 | 1.86 |      |
|                             |           |                                                 |                                     | FICTTSAIQNR           | 2.11                            | 1.45 | 1.57 | -    |      |
|                             | P53007    | Tricarboxylate transport protein, mitochondrial | TXTP                                | GIGDCVR               | 1.48                            | 1.59 | 1.14 | 0.80 |      |
|                             | Q53GQ0    | Very-long-chain 3-oxoacyl-CoA reductase         | DHB12                               | MININILSVCK           | 1.52                            | 2.32 | 1.80 | 0.46 |      |

N.B. '-' denotes not detected in at least 2 of 3 replicates

SUPPLEMENTAL TABLE S3. Glutathionylation profile of proteins involved in protein turnover as a function of time. Values in red represent the average H:L ratio of peptides normalized to the control that exceeded a 1.5-fold threshold across at least 2 replicates.

| Pathway               | Accession                                         | Description                                                  | Gene Symbol      | Peptide                | H:L fold-change across time (h) |      |      |      |
|-----------------------|---------------------------------------------------|--------------------------------------------------------------|------------------|------------------------|---------------------------------|------|------|------|
|                       |                                                   |                                                              |                  |                        | 3                               | 6    | 12   | 24   |
| Amino acid metabolism | Q9UDR5                                            | Alpha-aminoadipic semialdehyde synthase, mitochondrial       | AASS             | AGGILQEDISEACLILGVK    | 1.05                            | 1.65 | 1.13 | 0.72 |
|                       |                                                   |                                                              |                  | QLLCDLVGISPSSEHDVLK    | 1.08                            | 4.00 | 0.86 | 1.34 |
|                       | P35520                                            | Cystathionine beta-synthase                                  | CBS              | CIIVMPEK               | 1.69                            | -    | -    | -    |
|                       | Q14353                                            | Guanidinoacetate N-methyltransferase                         | GAMT             | TEVMALVPPADCR          | 1.29                            | -    | 1.21 | 2.72 |
|                       | P30038                                            | Delta-1-pyrroline-5-carboxylate dehydrogenase, mitochondrial | AL4A1            | CDDSVGYFVEPCIVESK      | 3.29                            | -    | 1.83 | 2.55 |
|                       | P31327                                            | Carbamoyl-phosphate synthase [ammonia], mitochondrial        | CPSM             | SAYALGGLGSGICPNR       | 1.68                            | 0.98 | 1.17 | -    |
|                       | P23526                                            | Adenosylhomocysteinase                                       | SAHH             | QAQYLGMSCDGPFKPDHYR    | 5.12                            | -    | -    | -    |
|                       | O15382                                            | Branched-chain-amino-acid aminotransferase, mitochondrial    | BCAT2            | EVFGSGTACQVCPVHR       | 8.21                            | -    | -    | -    |
|                       |                                                   |                                                              |                  | LCLPSFDK               | 13.63                           | 1.06 | 1.27 | 1.14 |
|                       |                                                   |                                                              |                  | LELLECIR               | 12.00                           | 4.60 | 2.40 | 0.90 |
|                       | Q9UBQ7                                            | Glyoxylate reductase/hydroxypyruvate reductase               | GRHPR            | GVAGAHGLLCLLSDHVDK     | 1.28                            | 2.27 | 1.39 | 1.13 |
|                       |                                                   |                                                              |                  | NCVILPH                | 1.58                            | 1.08 | 1.33 | 1.14 |
|                       | P09622                                            | Dihydrolipoyl dehydrogenase, mitochondrial                   | DLDH             | ILGPGAGEMVNEAALALEYGAS | 3.26                            | 2.92 | 2.64 | -    |
|                       |                                                   |                                                              |                  | CEDIAR                 |                                 |      |      |      |
|                       | P19623                                            | Spermidine synthase                                          | SPEE             | QFCQSLFPVVAY           | 1.81                            | -    | -    | -    |
|                       | P00505                                            | Aspartate aminotransferase, mitochondrial                    | AATM             | TCGFDFGTGAVEDISK       | 2.88                            | 1.02 | 0.95 | 0.48 |
|                       |                                                   |                                                              |                  | VGAFTMVCK              | 2.20                            | 1.17 | 0.66 | 0.70 |
|                       | P21953                                            | 2-oxoisovalerate dehydrogenase subunit beta, mitochondrial   | ODBB             | GLLLSCIEDK             | 1.92                            | 2.23 | 1.25 | -    |
|                       | P34896                                            | Serine hydroxymethyltransferase, cytosolic                   | GLYC             | YYGGAEVVDEIELLCQR      | 2.09                            | 1.39 | 1.71 | 1.40 |
|                       | Q02218                                            | 2-oxoglutarate dehydrogenase, mitochondrial                  | ODO1             | DVVVDLVCYR             | 1.90                            | 3.06 | 1.18 | 1.27 |
|                       |                                                   |                                                              | CSTPGNFFHVLR     | 3.62                   | -                               | -    | -    |      |
| P04424                | Argininosuccinate lyase                           | ARLY                                                         | CAGLLMTLK        | 3.12                   | -                               | 1.47 | -    |      |
|                       |                                                   |                                                              | MAEDLILYCTK      | 4.71                   | 3.25                            | 1.50 | 2.96 |      |
| P49189                | 4-trimethylaminobutyraldehyde dehydrogenase       | AL9A1                                                        | SPLIIFSDCDMNNAVK | 1.58                   | 1.15                            | 1.12 | 1.20 |      |
| P48506                | Glutamate--cysteine ligase catalytic subunit      | GSH1                                                         | GYVSDIDCR        | 104                    | 44.4                            | 46.1 | 1.00 |      |
| P31937                | 3-hydroxyisobutyrate dehydrogenase, mitochondrial | 3HIDH                                                        | HGYPLIYDVFPDACK  | 2.02                   | 1.05                            | 1.06 | 0.90 |      |

| Pathway                                                    | Accession                             | Description                     | Gene Symbol                      | Peptide                | H:L fold-change across time (h) |      |      |      |
|------------------------------------------------------------|---------------------------------------|---------------------------------|----------------------------------|------------------------|---------------------------------|------|------|------|
|                                                            |                                       |                                 |                                  |                        | 3                               | 6    | 12   | 24   |
| Eukaryotic translation initiation, elongation, termination | P25398                                | 40S ribosomal protein S12       | RS12                             | LVEALCAEHQINLIK        | 1.37                            | 2.89 | 1.27 | 1.00 |
|                                                            |                                       |                                 |                                  | QAHLCLVLANCDEPMYVK     | 3.41                            | -    | 1.30 | 1.4  |
|                                                            | P23396                                | 40S ribosomal protein S3        | RS3                              | ACYGVLR                | 1.90                            | 1.17 | 1.26 | 1.09 |
|                                                            |                                       |                                 |                                  | GCEVVVSGK              | 1.81                            | 1.93 | 1.27 | 1.24 |
|                                                            |                                       |                                 |                                  | GLCAIAQAESLR           | 2.22                            | 1.19 | 3.21 | 3.25 |
|                                                            | P61247                                | 40S ribosomal protein S3a       | RS3A                             | LFCVGF                 | 2.31                            | 4.25 | 1.41 | -    |
|                                                            | P62241                                | 40S ribosomal protein S8        | RS8                              | NCIVLIDSTPYR           | 1.37                            | 2.46 | 1.07 | 0.77 |
|                                                            | P05388                                | 60S acidic ribosomal protein P0 | RLA0                             | AGAIAPCEVTVPAQNTGLGPEK | 2.22                            | 0.93 | 1.38 | 2.13 |
|                                                            |                                       |                                 |                                  | CFIVGADNVGSK           | 1.8                             | 0.58 | 0.84 | 0.50 |
|                                                            |                                       |                                 |                                  | NVASVCLQIGYPTVASVPH    | 3.03                            | 1.20 | 1.63 | 0.94 |
|                                                            | P62906                                | 60S ribosomal protein L10a      | RL10A                            | VLCLAVAVGH             | 4.01                            | -    | 1.36 | -    |
|                                                            |                                       |                                 |                                  | VLCLAVAVGHVK           | 3.23                            | -    | 0.59 | -    |
|                                                            | P30050                                | 60S ribosomal protein L12       | RL12                             | CTGGVEVGATSALAPK       | 3.43                            | 1.53 | 1.32 | 0.55 |
|                                                            | P39023                                | 60S ribosomal protein L3        | RL3                              | TVFAEHISDECK           | 1.39                            | 1.09 | 1.62 | 1.28 |
|                                                            |                                       |                                 |                                  | VACIGAWHPAR            | 1.94                            | 0.97 | 2.48 | -    |
|                                                            |                                       |                                 |                                  | YCQVIR                 | 2.26                            | 0.94 | -    | -    |
|                                                            | P62910                                | 60S ribosomal protein L32       | RL32                             | ELEVLLMCNK             | 1.70                            | 1.34 | 1.37 | 1.32 |
|                                                            | P36578                                | 60S ribosomal protein L4        | RL4                              | GPCIYNEDNGIIK          | 1.37                            | 0.82 | 1.88 | 1.01 |
|                                                            |                                       |                                 |                                  | SGQGAFGNMCR            | 1.73                            | -    | 1.56 | 1.94 |
|                                                            | P46777                                | 60S ribosomal protein L5        | RL5                              | AAAYCTGLLLAR           | 1.64                            | 0.82 | 1.11 | 1.48 |
|                                                            |                                       |                                 |                                  | DIICQIAY               | 2.33                            | 0.79 | 1.48 | 0.85 |
|                                                            |                                       |                                 |                                  | IEGDMIVCAAYAHELPK      | 2.61                            | 2.32 | 1.56 | 0.88 |
|                                                            |                                       |                                 | VGLTNYAAAYCTGLLLAR               | 2.09                   | 2.02                            | -    | -    |      |
| Q01518                                                     | Adenylyl cyclase-associated protein 1 | CAP1                            | CVNTTLQIK                        | 2.07                   | 0.79                            | 1.08 | 0.35 |      |
|                                                            |                                       |                                 | INSITVDNCK                       | 1.49                   | 1.8                             | 1.07 | 0.41 |      |
| P12814                                                     | Alpha-actinin-1                       | ACTN1                           | CQLEINFNTLQTK                    | 92.6                   | 6.89                            | 11.6 | 5.18 |      |
|                                                            |                                       |                                 | DGLGFCALIHR                      | 0.99                   | 2.19                            | 0.65 | 0.03 |      |
|                                                            |                                       |                                 | EGLLLWCQR                        | 0.94                   | 1.76                            | 0.89 | 1.03 |      |
| P23528                                                     | Cofilin-1                             | COF1                            | HELQANCYEEVKDR                   | 2.15                   | 1.20                            | 1.00 | 0.92 |      |
| P68104                                                     | Elongation factor 1-alpha 1           | EF1A1                           | DGNASGTTLLEALDCILPPTRPTD<br>KPLR | 1.49                   | 2.33                            | 1.21 | 0.77 |      |

| Pathway | Accession | Description                                                | Gene Symbol | Peptide                                            | H:L fold-change across time (h) |      |      |      |
|---------|-----------|------------------------------------------------------------|-------------|----------------------------------------------------|---------------------------------|------|------|------|
|         |           |                                                            |             |                                                    | 3                               | 6    | 12   | 24   |
|         |           |                                                            |             | SGDAAIVDMVPGKPMCVEFSFSD<br>YPPLGR                  | 0.92                            | 54.0 | 3.38 | 1.35 |
|         | P13639    | Elongation factor 2                                        | EF2         | CLYASVLTAQPR                                       | 2.75                            | 1.39 | 1.1  | 0.67 |
|         |           |                                                            |             | STLTDSLVCCK                                        | 1.09                            | 0.44 | 0.68 | 1.80 |
|         |           |                                                            |             | YVEPIEDVPCGNIVGLVGVDQFL<br>VK                      | 0.24                            | 0.08 | 0.72 | 2.00 |
|         | P60842    | Eukaryotic initiation factor 4A-I                          | IF4A1       | VVMALGDYMGASCHACIGGTN<br>VR                        | 2.81                            | -    | -    | -    |
|         | P62495    | Eukaryotic peptide chain release factor subunit 1          | ERF1        | CGTIVTEEGK                                         | 2.83                            | -    | -    | -    |
|         | P47813    | Eukaryotic translation initiation factor 1A, X-chromosomal | IF1AX       | LEAMCFDGVK                                         | 1.69                            | -    | 1.30 | 0.02 |
|         | P41091    | Eukaryotic translation initiation factor 2 subunit 3       | IF2G        | YNIEVVCEYIVK                                       | 1.92                            | -    | 0.90 | -    |
|         | P55884    | Eukaryotic translation initiation factor 3 subunit B       | EIF3B       | NLFNVVDCK                                          | 2.79                            | 2.16 | 2.09 | 2.25 |
|         | P60228    | Eukaryotic translation initiation factor 3 subunit E       | EIF3E       | IHQCSIN<br>LFIFETFCR                               | 1.42                            | 1.10 | 1.15 | 2.86 |
|         | O75822    | Eukaryotic translation initiation factor 3 subunit J       | EIF3J       | ITNSLTVLCSEK                                       | 6.16                            | 2.03 | 1.33 | 0.82 |
|         | Q9UBQ5    | Eukaryotic translation initiation factor 3 subunit K       | EIF3K       | FICHVVGITYQHIDR                                    | 2.08                            | -    | 1.35 | -    |
|         | P02675    | Fibrinogen beta chain                                      | FIBB        | ECEEIIR<br>LESDVSAQMEYCR                           | 1.63                            | 2.09 | -    | -    |
|         |           |                                                            |             | TPCTVSCNIPVVSQK                                    | 0.78                            | 3.33 | 3.75 | 3.43 |
|         | P02679    | Fibrinogen gamma chain                                     | FIBG        | CHAGHLNGVYYQGGTYSK<br>VAQLEAQCQEPCKDTVQIHDITG<br>K | 2.91                            | 5.05 | 3.56 | 1.08 |
|         |           |                                                            |             | VHSPSGALEECYVTEIDQDK                               | 0.80                            | 1.60 | 2.09 | 2.13 |
|         |           |                                                            |             |                                                    | 3.74                            | 5.77 | 4.55 | 0.87 |
|         | P21333    | Filamin-A                                                  | FLNA        | VHSPSGALEECYVTEIDQDK                               | 2.25                            | 1.42 | 1.59 | 0.02 |
|         | P04075    | Fructose-bisphosphate aldolase A                           | ALDOA       | ALANSLACQGK                                        | 1.96                            | 0.79 | 0.94 | 1.08 |
|         | P62937    | Peptidyl-prolyl cis-trans isomerase A                      | PPIA        | ANAGPNTNGSQFFICTAK<br>TNGSQFFICTAK                 | 4.72                            | 3.88 | 3.80 | 0.06 |
|         |           |                                                            |             |                                                    | 1.56                            | 0.78 | 0.84 | 1.21 |
|         | P07737    | Profilin-1                                                 | PROF1       | CYEMASHLR<br>IDNLMADGTCQDAAIVGYK                   | 1.99                            | 1.60 | 1.06 | -    |
|         |           |                                                            |             |                                                    | 3.37                            | -    | 4.21 | -    |

| Pathway             | Accession            | Description                                    | Gene Symbol        | Peptide                      | H:L fold-change across time (h)     |       |                        |                        |       |                              |      |
|---------------------|----------------------|------------------------------------------------|--------------------|------------------------------|-------------------------------------|-------|------------------------|------------------------|-------|------------------------------|------|
|                     |                      |                                                |                    |                              | 3                                   | 6     | 12                     | 24                     |       |                              |      |
| Protein folding     | Q12846               | Syntaxin-4                                     | STX4               | CNSMQSEYR                    | 1.69                                | -     | -                      | -                      |       |                              |      |
|                     | O75083               | WD repeat-containing protein 1                 | WDR1               | MTVDESGQLISCSMDDTVR          | 12.4                                | 2.10  | 0.27                   | 1.18                   |       |                              |      |
|                     | Q9BVA1               | Tubulin beta-2B chain                          | TBB2B              | LTPTYGDLNHLVSATMSGVTT<br>CLR | 1.66                                | -     | -                      | -                      |       |                              |      |
|                     | Q9BQE3               | Tubulin alpha-1C chain                         | TBA1C              | AVCMLSNTTAVAEAWAR            | 0.91                                | -     | 0.73                   | 1.74                   |       |                              |      |
|                     |                      |                                                |                    | LADQCTGLQGFLVFHSF            | 1.34                                | -     | 10.9                   | 1.47                   |       |                              |      |
|                     |                      |                                                |                    | MVDNEAIYDICR                 | 10.9                                | 10.6  | 10.7                   | 8.46                   |       |                              |      |
|                     | P68363               | Tubulin alpha-1B chain                         | TBA1B              | TTLEHSDCAFMVDNEAIYDICR       | 1.47                                | 1.77  | 1.03                   | -                      |       |                              |      |
|                     |                      |                                                |                    | AYHEQLSVAEITNACFEPANQM<br>VK | 1.36                                | 1.25  | 1.97                   | 1.14                   |       |                              |      |
|                     |                      |                                                |                    | LADQCTGLQGF                  | 1.58                                | -     | 1.26                   | 0.74                   |       |                              |      |
|                     |                      |                                                |                    | TTLEHSDCAFMVDNEAIYDICR       | 2.03                                | -     | 1.22                   | 0.93                   |       |                              |      |
|                     | P50991               | T-complex protein 1 subunit delta              | TCPD               | YMACCLLYR                    | 1.99                                | -     | 1.44                   | 3.17                   |       |                              |      |
|                     |                      |                                                |                    | SIHDALCVIR                   | 1.65                                | 2.21  | 1.24                   | 0.49                   |       |                              |      |
|                     |                      |                                                |                    | P50990                       | T-complex protein 1 subunit theta   | TCPQ  | IGLSVSEVIEGYEIACR      | 1.63                   | 1.70  | 0.89                         | 0.43 |
|                     |                      |                                                |                    |                              |                                     |       | P68366                 | Tubulin alpha-4A chain | TBA4A | AYHEQLSVAEITNACFEPANQM<br>VK | 1.36 |
|                     |                      |                                                |                    | MVDNEAIYDICR                 | 12.0                                | 10.6  |                        |                        |       | 10.33                        | 8.46 |
|                     |                      |                                                |                    | SIQFVDWCPTGF                 | 6.53                                | -     |                        |                        |       | 7.97                         | -    |
|                     |                      |                                                |                    | P48643                       | T-complex protein 1 subunit epsilon | TCPE  | TTLEHSDCAFMVDNEAIYDICR | 1.47                   | 1.77  | 1.03                         | -    |
|                     | YMACCLLYR            | 1.99                                           | -                  |                              |                                     |       | 1.44                   | 3.17                   |       |                              |      |
|                     | SLHDALCVIR           | 1.70                                           | 2.21               |                              |                                     |       | 1.24                   | 0.49                   |       |                              |      |
|                     | P17987               | T-complex protein 1 subunit alpha              | TCPA               |                              |                                     |       | ALNCVVGSQGMPK          | 2.11                   | -     | 1.34                         | 1.01 |
| GANDFMCDEMER        |                      |                                                |                    | 3.35                         | 1.95                                | 2.66  | 2.29                   |                        |       |                              |      |
| IACLDLDFSLQK        |                      |                                                |                    | 3.11                         | 3.28                                | 1.22  | 1.05                   |                        |       |                              |      |
| P60709              | Actin, cytoplasmic 1 | ACTB                                           | ICDDELILIK         | 0.98                         | 1.51                                | 1.24  | 0.93                   |                        |       |                              |      |
|                     |                      |                                                | DDDIAALVVDNNGSGMCK | 25.71                        | 0.76                                | 27.24 | 1.39                   |                        |       |                              |      |
| Protein degradation | Q92890               | Ubiquitin fusion degradation protein 1 homolog | UFD1               | CFSVSMLAGPNDR                | 99.7                                | -     | -                      | -                      |       |                              |      |
|                     | P61086               | Ubiquitin-conjugating enzyme E2 K              | UBE2K              | ISSVTGAICLDILK               | 15.1                                | -     | -                      | -                      |       |                              |      |
|                     | P49792               | E3 SUMO-protein ligase RanBP2                  | RBP2               | IAELLCK                      | 2.41                                | 1.17  | 1.29                   | -                      |       |                              |      |
|                     | Q14258               | E3 ubiquitin/ISG15 ligase TRIM25               | TRI25              | NTVLCNVVEQFLQADLAR           | 2.74                                | -     | 44.7                   | -                      |       |                              |      |
|                     | Q7Z6Z7               | E3 ubiquitin-protein ligase HUWE1              | HUWE1              | VLGPAACR                     | 1.66                                | 1.21  | 1.26                   | -                      |       |                              |      |

| Pathway | Accession | Description                                     | Gene Symbol | Peptide          | H:L fold-change across time (h) |      |       |      |
|---------|-----------|-------------------------------------------------|-------------|------------------|---------------------------------|------|-------|------|
|         |           |                                                 |             |                  | 3                               | 6    | 12    | 24   |
|         | Q63HN8    | E3 ubiquitin-protein ligase RNF213              | RN213       | STDFLPVDCPVR     | 1.70                            | -    | -     | -    |
|         | P62333    | 26S protease regulatory subunit 10B             | PRS10       | AVASQLDCNFLK     | 3.05                            | 1.30 | 13.36 | 1.21 |
|         | Q99460    | 26S proteasome non-ATPase regulatory subunit 1  | PSMD1       | QCVENADLPEGEK    | 1.83                            | 3.58 | 1.86  | 0.70 |
|         |           |                                                 | PSMD1       | MEEADALIESLCR    | 1.27                            | 1.90 | 0.74  | -    |
|         | O00232    | 26S proteasome non-ATPase regulatory subunit 12 | PSD12       | AIYDTPCIQAESK    | 23.3                            | 1.14 | 2.18  | 1.80 |
|         | Q9UNM6    | 26S proteasome non-ATPase regulatory subunit 13 | PSD13       | FLGCVDIK         | 1.30                            | 1.80 | 1.15  | 0.81 |
|         | Q16401    | 26S proteasome non-ATPase regulatory subunit 5  | PSMD5       | FFGNLAVMDSPQICER | 108                             | -    | -     | -    |
|         |           |                                                 | PSMD5       | TTLCVSILER       | 1.76                            | -    | -     | -    |
|         | Q15008    | 26S proteasome non-ATPase regulatory subunit 6  | PSMD6       | VYQGLYCVAIR      | 1.79                            | 0.61 | 1.03  | 0.02 |

N.B. '-' denotes not detected in at least 2 of 3 replicates

SUPPLEMENTAL TABLE S4. Glutathionylation profile of proteins involved in defense against cellular stress as a function of time. Values in red represent the average H:L ratio of peptides normalized to the control that exceeded a 1.5-fold threshold across at least 2 replicates.

| Pathway                                          | Accession                   | Description                                             | Gene Symbol                               | Peptide                                                                              | H:L fold-change across time (h) |       |       |      |      |
|--------------------------------------------------|-----------------------------|---------------------------------------------------------|-------------------------------------------|--------------------------------------------------------------------------------------|---------------------------------|-------|-------|------|------|
|                                                  |                             |                                                         |                                           |                                                                                      | 3                               | 6     | 12    | 24   |      |
| <b>Detoxification of reactive oxygen species</b> | P04040                      | Catalase                                                | CATA                                      | LCENIAGHLK                                                                           | 3.04                            | 1.05  | 1.19  | 0.34 |      |
|                                                  | P30048                      | Thioredoxin-dependent peroxide reductase, mitochondrial | PRDX3                                     | ANEFHVDNCEVVAVSVDSHFSH<br>LAWINTPR                                                   | 5.49                            | -     | 4.02  | -    |      |
|                                                  | P00441                      | Superoxide dismutase [Cu-Zn]                            | SODC                                      | HVGDLGNVTADKDGVADVSIED<br>SVISLSGDHCIIGR                                             | 1.22                            | 1.63  | 1.81  | -    |      |
|                                                  | P04179                      | Superoxide dismutase [Mn], mitochondrial                | SODM                                      | GHLQIAACPNQDPLQGTTGLIPL<br>LGID                                                      | 83.76                           | -     | -     | -    |      |
|                                                  | Q96HE7                      | ERO1-like protein alpha                                 | ERO1A                                     | YSEEANNLIEECEQAER                                                                    | 0.97                            | 0.94  | 1.94  | 1.34 |      |
|                                                  | Q06830                      | Peroxiredoxin-1                                         | PRDX1                                     | LNCQVIGASVDSHFCH                                                                     | 0.98                            | -     | 3.43  | -    |      |
| <b>Phase I functionalization</b>                 | P21397                      | Amine oxidase [flavin-containing] A                     | AOFA                                      | ICELYAK                                                                              | 2.23                            | 2.13  | 1.33  | 0.58 |      |
|                                                  | P27338                      | Amine oxidase [flavin-containing] B                     | AOFB                                      | CIVYYK<br>LCELYAK                                                                    | 3.03                            | -     | 1.21  | -    |      |
|                                                  | P07327                      | Alcohol dehydrogenase 1A                                | ADH1A                                     | NPESNYCLK                                                                            | 300                             | 150   | -     | -    |      |
|                                                  | P00325                      | Alcohol dehydrogenase 1B                                | ADH1B                                     | MVAVGICR<br>NPESNYCLK                                                                | 5.66                            | 2.55  | 1.81  | 1.14 |      |
|                                                  | P00326                      | Alcohol dehydrogenase 1C                                | ADH1G                                     | NPESNYCLK                                                                            | 333                             | -     | -     | -    |      |
|                                                  | P05181                      | Cytochrome P450 2E1                                     | CP2E1                                     | DLTDCLLVEMEK                                                                         | 2.70                            | 51.58 | 3.90  | -    |      |
|                                                  | P10632                      | Cytochrome P450 2C8                                     | CP2C8                                     | DFIDCFLIK                                                                            | 3.01                            | 0.96  | 1.27  | 1.31 |      |
|                                                  | P00352                      | Retinal dehydrogenase 1                                 | AL1A1                                     | AYLNDLAGCIK<br>FPVFNPAEEELCQVEEGDKEDV<br>DK<br>LECGGGPWGNIK<br>LNDLAGCIK<br>YCAGWADK | 2.19                            | 1.00  | 1.00  | 1.16 |      |
|                                                  | Q9NR19                      | Acetyl-coenzyme A synthetase, cytoplasmic               | ACSA                                      | GATTNICYNVLDK                                                                        | 236                             | 164   | 68.7  | -    |      |
|                                                  | Q16850                      | Lanosterol 14-alpha demethylase                         | CP51A                                     | CIGENFAYVQIK                                                                         | 4.95                            | 2.69  | 1.33  | -    |      |
|                                                  | Q9HBI6                      | Phylloquinone omega-hydroxylase CYP4F11                 | CP4FB                                     | LQCFPQPPK                                                                            | 2.70                            | 1.43  | 1.11  | 0.88 |      |
|                                                  | P10620                      | Microsomal glutathione S-transferase 1                  | MGST1                                     | VFANPEDCVAFGK                                                                        | 2.73                            | 1.29  | 0.91  | 1.10 |      |
|                                                  | <b>Phase II conjugation</b> | Q9NR19                                                  | Acetyl-coenzyme A synthetase, cytoplasmic | ACSA                                                                                 | GATTNICYNVLDK                   | 1.83  | 72.98 | 1.22 | 2.27 |
|                                                  |                             | Q16850                                                  | Lanosterol 14-alpha demethylase           | CP51A                                                                                | CIGENFAYVQIK                    | 1.07  | 1.07  | 1.48 | 2.41 |
|                                                  |                             | Q9HBI6                                                  | Phylloquinone omega-hydroxylase CYP4F11   | CP4FB                                                                                | LQCFPQPPK                       | 1.32  | 1.27  | 1.10 | 2.76 |



| Pathway                                     | Accession                         | Description                                  | Gene Symbol | Peptide                           | H:L fold-change across time (h) |      |      |      |
|---------------------------------------------|-----------------------------------|----------------------------------------------|-------------|-----------------------------------|---------------------------------|------|------|------|
|                                             |                                   |                                              |             |                                   | 3                               | 6    | 12   | 24   |
|                                             | P40261                            | Nicotinamide N-methyltransferase             | NNMT        | IFCLDGVK                          | 2.45                            | 3.18 | 1.35 | 0.89 |
|                                             | P48506                            | Glutamate--cysteine ligase catalytic subunit | GSH1        | GYVSDIDCR                         | 104                             | 44.4 | 46.1 | 1.00 |
|                                             | P36269                            | Gamma-glutamyltransferase 5                  | GGT5        | FLNVVQAVSQEGACVYAVSDLR            | 2.78                            | 39.8 | -    | -    |
|                                             |                                   |                                              |             | HQAPCGPQAF                        | 1.17                            | 0.69 | 2.38 | -    |
|                                             | P48637                            | Glutathione synthetase                       | GSHB        | IEPEPFENCLLR                      | 4.70                            | -    | -    | -    |
|                                             | P23526                            | Adenosylhomocysteinase                       | SAHH        | QAQYLGMSCDGPFKPDHYR               | 5.12                            | -    | -    | -    |
|                                             | P51580                            | Thiopurine S-methyltransferase               | TPMT        | SWGIDCLFEK                        | 2.74                            | -    | -    | -    |
|                                             | O60701                            | UDP-glucose 6-dehydrogenase                  | UGDH        | DPYEACDGAH                        | 0.88                            | 1.10 | 1.59 | 1.00 |
|                                             |                                   |                                              |             | DVLNLVYLCEALNLPEVAR               | 4.65                            | 4.50 | 1.45 | 1.07 |
|                                             | O60656                            | UDP-glucuronosyltransferase 1-9              | UD19        | NHIMHLEEHLCHR                     | 6.40                            | -    | 1.09 | 0.59 |
|                                             | Q06520                            | Bile salt sulfotransferase                   | ST2A1       | ICQFLGK                           | 1.00                            | 0.92 | 1.24 | 2.13 |
| <b>GSH and sulfur amino acid metabolism</b> | P35520                            | Cystathionine beta-synthase                  | CBS         | CIIVMPEK                          | 1.69                            | -    | -    | -    |
|                                             | P23526                            | Adenosylhomocysteinase                       | SAHH        | QAQYLGMSCDGPFKPDHYR               | 5.12                            | 4.33 | -    | -    |
|                                             | P48506                            | Glutamate--cysteine ligase catalytic subunit | GSH1        | GYVSDIDCR                         | 104                             | 44.4 | 46.1 | 1.00 |
|                                             | P48637                            | Glutathione synthetase                       | GSHB        | IEPEPFENCLLR                      | 4.70                            | -    | -    | -    |
|                                             | P19623                            | Spermidine synthase                          | SPEE        | QFCQSLFPVVAY                      | 1.81                            | -    | -    | -    |
|                                             | P52788                            | Spermine synthase                            | SPSY        | LYCPVEFSK                         | 2.55                            | -    | -    | -    |
| <b>Cellular response to heat stress</b>     | O95816                            | BAG family molecular chaperone regulator 2   | BAG2        | FQSIVIGCALEDQK                    | 2.37                            | -    | 0.85 | 0.84 |
|                                             | Q8N163                            | Cell cycle and apoptosis regulator protein 2 | CCAR2       | GEASEDLCEMALDPELLLLR              | 2.64                            | -    | 4.49 | -    |
|                                             |                                   |                                              |             | TVDSPICDFLELQR                    | 1.97                            | -    | 1.47 | 1.61 |
|                                             | Q15185                            | Prostaglandin E synthase 3                   | TEBP        | LTFSCLGGSDNFK                     | 1.73                            | 1.92 | 2.69 | 3.31 |
|                                             | P68104                            | Elongation factor 1-alpha 1                  | EF1A1       | DGNASGTTLLEALDCILPPTRPTD<br>KPLR  | 1.49                            | 2.33 | 1.21 | 0.77 |
|                                             |                                   |                                              |             | SGDAAIVDMVPGKPMCVEFSFSD<br>YPPLGR | 0.92                            | 54.0 | 3.38 | 1.35 |
|                                             | P49792                            | E3 SUMO-protein ligase RanBP2                | RBP2        | IAELLCK                           | 2.41                            | 1.17 | 1.29 | -    |
|                                             | Q8N1F7                            | Nuclear pore complex protein Nup93           | NUP93       | CGDLLAASQVVNR                     | 1.61                            | 1.26 | 1.15 | 1.41 |
|                                             | P34932                            | Heat shock 70 kDa protein 4                  | HSP74       | FLEMCNDLLAR                       | 0.98                            | 2.71 | 1.01 | -    |
|                                             | O95757                            | Heat shock 70 kDa protein 4L                 | HS74L       | AQFEQLCASLLAR                     | 3.14                            | 3.04 | 1.23 | -    |
|                                             | P08107                            | Heat shock 70 kDa protein 1A/1B              | HSP71       | CQEVISWLDANTLAEKDEFEHK            | 5.07                            | -    | -    | -    |
| P11142                                      | Heat shock cognate 71 kDa protein | HSP7C                                        | CNEIINWLDK  | 1.15                              | 3.82                            | 1.00 | 1.78 |      |

| Pathway | Accession | Description                               | Gene Symbol | Peptide                | H:L fold-change across time (h) |      |      |      |
|---------|-----------|-------------------------------------------|-------------|------------------------|---------------------------------|------|------|------|
|         |           |                                           |             |                        | 3                               | 6    | 12   | 24   |
|         | P07900    | Heat shock protein HSP 90-alpha           | HS90A       | CLELFTELAEDK           | 0.91                            | 1.63 | 0.33 | -    |
|         |           |                                           |             | FENLCK                 | 3.66                            | -    | -    | -    |
|         | P08238    | Heat shock protein HSP 90-beta            | HS90B       | AKFENLCK               | 1.58                            | -    | -    | -    |
|         |           |                                           |             | FENLCK                 | 3.60                            | -    | -    | -    |
|         |           |                                           |             | VFIMDSCDELIPEYLNfir    | 67.5                            | 34.3 | 79.2 | 50.3 |
|         | P55072    | Transitional endoplasmic reticulum ATPase | TERA        | EAVCIVLSDDTCSDEK       | 59.4                            | -    | 40.2 | -    |
|         |           |                                           |             | LADDVDLEQVANETHGHVgADL | 91.9                            | 281  | 64.0 | 37.6 |
|         |           |                                           |             | AALCSEALQAIR           |                                 |      |      |      |

N.B. '-' denotes not detected in at least 2 of 3 replicates

SUPPLEMENTAL TABLE S5 Glutathionylation profile of proteins involved in calcium dynamics and the mitochondrial permeability transition pore formation as a function of time. Values in red represent the average H:L ratio of peptides normalized to the control that exceed a 1.5-fold threshold across at least 2 replicates.

| Pathway                                                     | Accession                             | Description                                         | Gene Symbol        | Peptide             | H:L fold-change across time (h) |      |      |      |
|-------------------------------------------------------------|---------------------------------------|-----------------------------------------------------|--------------------|---------------------|---------------------------------|------|------|------|
|                                                             |                                       |                                                     |                    |                     | 3                               | 6    | 12   | 24   |
| <b>Calcium dynamics</b>                                     | P16615                                | Sarcoplasmic/endoplasmic reticulum calcium ATPase 2 | AT2A2              | ANACNSVIK           | -                               | 1.24 | -    | 1.68 |
|                                                             |                                       |                                                     |                    | GTAVAICR            | 2.32                            | 1.30 | 1.18 | 1.35 |
|                                                             | P20020                                | Plasma membrane calcium-transporting ATPase 1       | AT2B1              | TICLAFR             | 5.00                            | -    | 1.10 | -    |
| <b>Mitochondrial permeability transition pore formation</b> | P21796                                | Voltage-dependent anion-selective channel protein 1 | VDAC1              | YQIDPDACFSAK        | 1.67                            | 0.99 | 1.28 | 0.88 |
|                                                             | P45880                                | Voltage-dependent anion-selective channel protein 2 | VDAC2              | SCSGVEFSTSGSNTDTGK  | 1.26                            | 0.81 | 1.32 | 2.58 |
|                                                             | Q9Y277                                | Voltage-dependent anion-selective channel protein 3 | VDAC3              | SCSGVEFSTSGHAYTDTGK | 0.87                            | 0.83 | 1.68 | 1.84 |
|                                                             |                                       |                                                     |                    | VCNYGLTFTQK         | 0.97                            | 0.96 | 1.68 | 2.50 |
|                                                             | P12235/<br>P05141                     | ADP/ATP translocase 1/2                             | ADT1/<br>ADT2      | QYKGIIDCVVR         | 3.42                            | 2.64 | 1.18 | 1.15 |
| P62937                                                      | Peptidyl-prolyl cis-trans isomerase A | PPIA                                                | ANAGPNTNGSQFFICTAK | 4.72                | 3.88                            | 3.80 | 0.06 |      |

N.B. '-' denotes not detected in at least 2 of 3 replicates

SUPPLEMENTAL TABLE S6. Summarized reports of APAP-induced metabolic perturbations from literature and in-house data.

| Pathway                                                      | Model system | Matrix | Analytical platform             | Metabolites                                                                                                                                                                                                                                                                       | Directionality                                                                  | Ref  |
|--------------------------------------------------------------|--------------|--------|---------------------------------|-----------------------------------------------------------------------------------------------------------------------------------------------------------------------------------------------------------------------------------------------------------------------------------|---------------------------------------------------------------------------------|------|
| <b>Glycolysis, pyruvate metabolism</b>                       | Mouse        | Plasma | NMR                             | Lactate                                                                                                                                                                                                                                                                           | Elevated                                                                        | (12) |
|                                                              |              | Liver  |                                 | Lactate                                                                                                                                                                                                                                                                           | Elevated                                                                        |      |
|                                                              | Rat          | Urine  | NMR                             | Lactate                                                                                                                                                                                                                                                                           | Elevated                                                                        | (13) |
|                                                              | Human        | Plasma | NMR                             | Lactate                                                                                                                                                                                                                                                                           | Elevated                                                                        | (14) |
|                                                              | Human        | Serum  | NMR                             | Lactate                                                                                                                                                                                                                                                                           | Elevated                                                                        | (15) |
|                                                              | Mouse        | Plasma | NMR                             | Pyruvate                                                                                                                                                                                                                                                                          | Elevated                                                                        | (12) |
|                                                              | Rat          | Plasma | NMR                             | Pyruvate                                                                                                                                                                                                                                                                          | Elevated                                                                        | (13) |
|                                                              | Rat          | Urine  | NMR, LC/MS                      | Pyruvate                                                                                                                                                                                                                                                                          | Decreased                                                                       | (16) |
|                                                              | Rat          | Liver  | CE/TOFMS                        | Phosphoenolpyruvate                                                                                                                                                                                                                                                               | Elevated                                                                        | (17) |
| <b>Mitochondrial fatty acid <math>\beta</math>-oxidation</b> | Mouse        | Serum  | LC/MS                           | Palmitoyl, oleoyl, myristoylcarnitine<br>Carnitine<br>Acetylcarnitine                                                                                                                                                                                                             | Peak at 4 h followed by decline<br>Peak at 8 h followed by decline<br>Decreased | (18) |
|                                                              | Mouse        | Plasma | LC/MS                           | Palmitoyl, oleoyl, myristoyl, palmitoleoyl carnitine                                                                                                                                                                                                                              | Peak at 2 h followed by decline                                                 | (19) |
|                                                              | Mouse        | Serum  | LC/MS                           | Palmitoyl, linoleoyl, oleoyl carnitine                                                                                                                                                                                                                                            | Elevated from 3-12 h                                                            | (20) |
|                                                              | Mouse        | Serum  | LC/MS                           | Palmitoyl, oleoyl, myristoyl, palmitoleoyl carnitine                                                                                                                                                                                                                              | Elevated                                                                        | (21) |
|                                                              | Mouse        | Serum  | LC/MS                           | Palmitoyl, oleoyl carnitine                                                                                                                                                                                                                                                       | Elevated                                                                        | (22) |
|                                                              | Mouse        | Serum  | LC/MS                           | Palmitoyl carnitine                                                                                                                                                                                                                                                               | Elevated                                                                        | (23) |
|                                                              | Human        | Plasma | LC/MS                           | Palmitoyl, linoleoyl, oleoyl carnitine                                                                                                                                                                                                                                            | No change from healthy patients                                                 | (20) |
|                                                              | Human        | Serum  | LC/MS                           | Palmitoyl, oleoyl, myristoyl, palmitoleoyl carnitine                                                                                                                                                                                                                              | Elevated                                                                        | (24) |
|                                                              | Rat          | Serum  | GC/MS                           | <i>Fatty acids: Oleic acid, vaccenic acid, linoleic acid, eicosatrienoic acid, arachidonic acid, eicosapentaenoic acid, docosahexaenoic acid, myristic acid, palmitic acid, palmitoleic acid, margaric acid, stearic acid, <math>\alpha</math>-linolenic acid, arachidic acid</i> | Elevated                                                                        | (25) |
|                                                              | Rat          | Plasma | NMR                             | Unspecified lipid                                                                                                                                                                                                                                                                 | Decreased                                                                       | (13) |
|                                                              | Mouse        | Liver  | NMR                             | Triglycerides, monounsaturated fatty acids<br>Polyunsaturated fatty acids                                                                                                                                                                                                         | Elevated<br>Decreased                                                           | (12) |
|                                                              |              | Plasma |                                 | Triglycerides                                                                                                                                                                                                                                                                     | Elevated                                                                        |      |
|                                                              | Mouse        | Serum  | LC/MS                           | Triglycerides, free fatty acids                                                                                                                                                                                                                                                   | Elevated                                                                        | (19) |
| Mouse                                                        | Serum        | LC/MS  | Triglycerides, free fatty acids | Elevated                                                                                                                                                                                                                                                                          | (22)                                                                            |      |
| <b>Citric acid cycle</b>                                     | Rat          | Urine  | NMR                             | 2-oxoglutarate, citrate, succinate                                                                                                                                                                                                                                                | Decreased                                                                       | (13) |
|                                                              | Rat          | Urine  | NMR, LC/MS                      | 2-oxoglutarate, citrate, succinate                                                                                                                                                                                                                                                | Decreased                                                                       | (16) |
|                                                              | Rat          | Liver  | CE/TOFMS                        | Citrate                                                                                                                                                                                                                                                                           | Elevated                                                                        | (17) |
|                                                              |              |        |                                 | Malate, succinate                                                                                                                                                                                                                                                                 | Decreased                                                                       |      |

| Pathway                              | Model system | Matrix       | Analytical platform                                               | Metabolites                                                                                               | Directionality                  | Ref           |
|--------------------------------------|--------------|--------------|-------------------------------------------------------------------|-----------------------------------------------------------------------------------------------------------|---------------------------------|---------------|
|                                      | Rat          | Urine        | LC/MS, GC/MS                                                      | Isocitrate, aconitate, oxaloacetate                                                                       | Decreased                       | In-house (14) |
|                                      | Human        | Urine        | NMR                                                               | Citrate                                                                                                   | Decreased                       |               |
| Glycogen turnover                    | Mouse        | Liver        | UV/Vis                                                            | Glycogen                                                                                                  | Decreased                       | (26)          |
|                                      |              | Blood        |                                                                   | Glucose                                                                                                   | Peak at 2 h followed by decline |               |
|                                      | Mouse        | Liver        | NMR                                                               | Glycogen, glucose                                                                                         | Decreased                       | (12)          |
|                                      |              | Plasma       |                                                                   | Glucose                                                                                                   | Elevated                        |               |
|                                      | Rat          | Urine        | NMR, LC/MS                                                        | Glucose                                                                                                   | Decreased                       | (16)          |
|                                      | Rat          | Liver        |                                                                   | Glycogen                                                                                                  | Decreased                       |               |
|                                      |              | Serum        |                                                                   | Glucose                                                                                                   |                                 |               |
| Amino acid                           | Mouse        | Liver        | NMR                                                               | Alanine, isoleucine, leucine, lysine, valine, phenylalanine, tyrosine                                     | Elevated                        | (12)          |
|                                      | Rat          | Plasma       | NMR                                                               | Isoleucine                                                                                                | Elevated                        | (13)          |
|                                      | Pig          | Serum        | NMR                                                               | Isoleucine, tyrosine, phenylalanine                                                                       | Elevated                        | (27)          |
|                                      |              |              |                                                                   | Valine                                                                                                    | Decreased                       |               |
|                                      | Human        | Plasma       | NMR                                                               | 3-hydroxyisovalerate, isoleucine, acetylglycine, glutamine, isobutyrate, phenylalanine                    | Elevated                        | (14)          |
| GSH and sulfur amino acid metabolism | Mouse        | Liver        | CE/TOFMS                                                          | Spermine, hypotaurine, S-adenosylmethionine, glycine, glutamine, spermidine, cysteine, glutamate, taurine | Decreased                       | (17)          |
|                                      | Rat          | Urine        | NMR                                                               | Taurine                                                                                                   | Elevated                        | (13)          |
|                                      | Rat          | Urine        | NMR, LC/MS                                                        | Trigonelline                                                                                              | Decreased                       | (16)          |
|                                      |              |              |                                                                   | S-adenosylmethionine                                                                                      |                                 |               |
|                                      | Rat          | Urine        | NMR                                                               | Taurine                                                                                                   |                                 |               |
|                                      |              |              |                                                                   | 5-oxoproline                                                                                              | Increased                       | (28)          |
|                                      | Mouse        | Liver        | CE/TOFMS                                                          | Methionine, S-adenosylhomocysteine, ophthalmic acid                                                       | Elevated                        | (17)          |
| Rat                                  | Liver        | LC/MS, GC/MS | Taurine, hypotaurine                                              | Decreased                                                                                                 | (29)                            |               |
|                                      |              |              | Ophthalmic acid, 5-oxoproline, $\gamma$ -glutamyl-2-aminobutyrate | Increased                                                                                                 |                                 |               |
| Phospholipid turnover                | Mouse        | Liver        | NMR                                                               | All phospholipid species, arachidonic acid                                                                | Decreased                       | (12)          |
|                                      |              |              |                                                                   | Choline, phosphocholine                                                                                   | Elevated                        |               |
| Bile acids                           | Rat          | Plasma       | LC/MS, GC/MS                                                      | <i>Glycine conjugated bile acids:</i> Glycocholate, glycochenodeoxycholate                                | Elevated                        | (29)          |
|                                      |              |              |                                                                   | <i>Taurine conjugated bile acids:</i> Taurocholate, taurochenodeoxycholate                                | Decreased                       |               |
|                                      | Human        | Serum        | LC/MS                                                             | Glycodeoxycholic acid                                                                                     | Increased                       | (30)          |
| Others                               | Rat          | Plasma       | NMR                                                               | Trimethylamine, creatinine                                                                                | Elevated                        | (13)          |
|                                      | Rat          | Urine        | NMR                                                               | Allantoin, hippurate, creatinine, trimethylamine <i>N</i> -oxide                                          | Decreased                       | (13)          |

| Pathway | Model system | Matrix | Analytical platform | Metabolites                                                                                                                                                                                     | Directionality        | Ref      |
|---------|--------------|--------|---------------------|-------------------------------------------------------------------------------------------------------------------------------------------------------------------------------------------------|-----------------------|----------|
|         | Rat          | Urine  | NMR, LC/MS          | Trimethylamine <i>N</i> -oxide, dimethylamine, hippurate, glycine, N,N-dimethylglycine, N-isovalerylglycine, betaine, <i>trans</i> -aconitate, pipercolinate, ferulic acid<br>Creatine, acetate | Decreased             | (16)     |
|         | Human        | Urine  | NMR                 | Hippurate<br>3-chlorotyrosine, glutarate                                                                                                                                                        | Decreased<br>Elevated | (14)     |
|         |              | Plasma |                     | Acetone, acetate, ethanol                                                                                                                                                                       | Elevated              |          |
|         | Rat          | Urine  | LC/MS, GC/MS        | Hippurate, pantothenate, phenylacetyl-glycine, pipercolinate, ferulic acid sulfate<br>Indoxylsulfuric acid, pyrocatechol sulfate                                                                | Decreased<br>Elevated | In-house |

SUPPLEMENTAL TABLE S7. List of proteins known to be covalently adducted by APAP. Proteins that are also glutathionylated in our dataset are listed in bold.

| <b>Protein</b>                                                              | <b>Reference</b> |
|-----------------------------------------------------------------------------|------------------|
| <b>2,4-Dienoyl-CoA reductase</b>                                            | (31)             |
| 3-Hydroxyanthranilate 3,4-dioxygenase                                       | (31)             |
| Aldehyde dehydrogenase                                                      | (31, 32)         |
| <b>Annexin A2</b>                                                           |                  |
| <b>Argininosuccinate synthetase</b>                                         | (33)             |
| Sulfotransferase (aryl sulfotransferase)                                    | (31)             |
| <b>ATP synthase (ATP synthetase) <math>\alpha</math> subunit</b>            | (31)             |
| Calreticulin precursor                                                      | (34)             |
| <b>Carbomoyl-phosphate synthase (carbamyl phosphate synthetase-I)</b>       | (32)             |
| Carbonic anhydrase III                                                      | (31)             |
| Formimidoyltransferase cyclodeaminase                                       |                  |
| <b>Glutamate dehydrogenase</b>                                              | (32)             |
| Glutamine synthetase                                                        | (32)             |
| Glutathione peroxidase                                                      | (31)             |
| Glutathione <i>S</i> -transferase $\pi$                                     | (31)             |
| Glyceraldehyde-3-phosphate dehydrogenase                                    | (35)             |
| Glycine amidinotransferase, mitochondrial                                   |                  |
| Glycine <i>N</i> -methyl transferase                                        | (31)             |
| Lamin A                                                                     | (32)             |
| Methionine adenosyl transferase                                             | (31)             |
| <b>Microsomal glutathione <i>S</i>-transferase</b>                          | (33)             |
| <i>N</i> -10-formyl tetrahydrofolate dehydrogenase                          | (32)             |
| Osteoblast-specific factor 3                                                | (31)             |
| <b>Peroxiredoxin 3, mouse (housekeeping protein)</b>                        | (31)             |
| Peroxiredoxin 6                                                             |                  |
| <b>Protein deglycase DJ-1</b>                                               |                  |
| Proteasome subunit C8                                                       | (31)             |
| <b>Protein disulfide isomerase (thiol:protein disulfide oxidoreductase)</b> | (34)             |
| <b>Protein synthesis initiation factor 4A</b>                               | (31)             |
| Pyrophosphatase                                                             | (31)             |
| Ribophorin I                                                                | (33)             |
| <b>Selenium-binding protein 1 (acetaminophen-binding protein)</b>           | (31, 32)         |
| Sorbitol dehydrogenase                                                      | (31)             |
| Thioether <i>S</i> -methyltransferase                                       | (31)             |
| Tropomyosin 5                                                               | (31)             |
| Urate oxidase                                                               | (31)             |
| <b>Voltage-dependent anion channel 2</b>                                    |                  |

N.B. Names in parentheses refer to the synonymous protein name reported in the original publication.

## Supplemental References

1. Robinson KM, Janes MS, Pehar M, Monette JS, Ross MF, Hagen TM, Murphy MP, et al. Selective fluorescent imaging of superoxide in vivo using ethidium-based probes. *Proc Natl Acad Sci U S A* 2006;103:15038-15043.
2. Hornak V, Abel R, Okur A, Strockbine B, Roitberg A, Simmerling C. Comparison of multiple Amber force fields and development of improved protein backbone parameters. *Proteins* 2006;65:712-725.
3. Dickson CJ, Madej BD, Skjevik AA, Betz RM, Teigen K, Gould IR, Walker RC. Lipid14: The Amber Lipid Force Field. *J Chem Theory Comput* 2014;10:865-879.
4. Essmann U, Perera L, Berkowitz ML, Darden T, Lee H, Pedersen LG. A smooth particle mesh Ewald method. *The Journal of Chemical Physics* 1995;103:8577-8593.
5. Van Der Spoel D, Lindahl E, Hess B, Groenhof G, Mark AE, Berendsen HJ. GROMACS: fast, flexible, and free. *J Comput Chem* 2005;26:1701-1718.
6. Milacic M, Haw R, Rothfels K, Wu G, Croft D, Hermjakob H, D'Eustachio P, et al. Annotating cancer variants and anti-cancer therapeutics in reactome. *Cancers (Basel)* 2012;4:1180-1211.
7. Su D, Gaffrey MJ, Guo J, Hatchell KE, Chu RK, Clauss TR, Aldrich JT, et al. Proteomic identification and quantification of S-glutathionylation in mouse macrophages using resin-assisted enrichment and isobaric labeling. *Free Radic Biol Med* 2014;67:460-470.
8. Go YM, Roede JR, Orr M, Liang Y, Jones DP. Integrated redox proteomics and metabolomics of mitochondria to identify mechanisms of cd toxicity. *Toxicol Sci* 2014;139:59-73.
9. Leichert LI, Gehrke F, Gudiseva HV, Blackwell T, Ilbert M, Walker AK, Strahler JR, et al. Quantifying changes in the thiol redox proteome upon oxidative stress in vivo. *Proc Natl Acad Sci U S A* 2008;105:8197-8202.
10. Israelson A, Abu-Hamad S, Zaid H, Nahon E, Shoshan-Barmatz V. Localization of the voltage-dependent anion channel-1 Ca<sup>2+</sup>-binding sites. *Cell Calcium* 2007;41:235-244.
11. De Stefani D, Bononi A, Romagnoli A, Messina A, De Pinto V, Pinton P, Rizzuto R. VDAC1 selectively transfers apoptotic Ca<sup>2+</sup> signals to mitochondria. *Cell Death Differ* 2012;19:267-273.
12. Coen M, Lenz EM, Nicholson JK, Wilson ID, Pognan F, Lindon JC. An integrated metabolomic investigation of acetaminophen toxicity in the mouse using NMR spectroscopy. *Chem Res Toxicol* 2003;16:295-303.
13. Fukuhara K, Ohno A, Ando Y, Yamoto T, Okuda H. A 1H NMR-based metabolomics approach for mechanistic insight into acetaminophen-induced hepatotoxicity. *Drug Metab Pharmacokinet* 2011;26:399-406.
14. Kim JW, Ryu SH, Kim S, Lee HW, Lim MS, Seong SJ, Yoon YR, et al. Pattern recognition analysis for hepatotoxicity induced by acetaminophen using plasma and urinary 1H NMR-based metabolomics in humans. *Anal Chem* 2013;85:11326-11334.
15. Fannin RD, Russo M, O'Connell TM, Gerrish K, Winnike JH, Macdonald J, Newton J, et al. Acetaminophen dosing of humans results in blood transcriptome and metabolome changes consistent with impaired oxidative phosphorylation. *Hepatology* 2010;51:227-236.
16. Sun J, Schnackenberg LK, Holland RD, Schmitt TC, Cantor GH, Dragan YP, Beger RD. Metabonomics evaluation of urine from rats given acute and chronic doses of acetaminophen using NMR and UPLC/MS. *J Chromatogr B Analyt Technol Biomed Life Sci* 2008;871:328-340.



17. Soga T, Baran R, Suematsu M, Ueno Y, Ikeda S, Sakurakawa T, Kakazu Y, et al. Differential metabolomics reveals ophthalmic acid as an oxidative stress biomarker indicating hepatic glutathione consumption. *J Biol Chem* 2006;281:16768-16776.
18. Bhattacharyya S, Pence L, Beger R, Chaudhuri S, McCullough S, Yan K, Simpson P, et al. Acylcarnitine profiles in acetaminophen toxicity in the mouse: comparison to toxicity, metabolism and hepatocyte regeneration. *Metabolites* 2013;3:606-622.
19. Chen C, Krausz KW, Shah YM, Idle JR, Gonzalez FJ. Serum metabolomics reveals irreversible inhibition of fatty acid beta-oxidation through the suppression of PPARalpha activation as a contributing mechanism of acetaminophen-induced hepatotoxicity. *Chem Res Toxicol* 2009;22:699-707.
20. McGill MR, Li F, Sharpe MR, Williams CD, Curry SC, Ma X, Jaeschke H. Circulating acylcarnitines as biomarkers of mitochondrial dysfunction after acetaminophen overdose in mice and humans. *Arch Toxicol* 2014;88:391-401.
21. Yu J, Jiang YS, Jiang Y, Peng YF, Sun Z, Dai XN, Cao QT, et al. Targeted metabolomic study indicating glycyrrhizin's protection against acetaminophen-induced liver damage through reversing fatty acid metabolism. *Phytother Res* 2014;28:933-936.
22. Bi H, Li F, Krausz KW, Qu A, Johnson CH, Gonzalez FJ. Targeted Metabolomics of Serum Acylcarnitines Evaluates Hepatoprotective Effect of Wuzhi Tablet (*Schisandra sphenanthera* Extract) against Acute Acetaminophen Toxicity. *Evid Based Complement Alternat Med* 2013;2013:985257.
23. Patterson AD, Shah YM, Matsubara T, Krausz KW, Gonzalez FJ. Peroxisome proliferator-activated receptor alpha induction of uncoupling protein 2 protects against acetaminophen-induced liver toxicity. *Hepatology* 2012;56:281-290.
24. Bhattacharyya S, Yan K, Pence L, Simpson PM, Gill P, Letzig LG, Beger RD, et al. Targeted liquid chromatography-mass spectrometry analysis of serum acylcarnitines in acetaminophen toxicity in children. *Biomark Med* 2014;8:147-159.
25. Xiong YH, Xu Y, Yang L, Wang ZT. Gas chromatography-mass spectrometry-based profiling of serum fatty acids in acetaminophen-induced liver injured rats. *J Appl Toxicol* 2014;34:149-157.
26. Hinson JA, Mays JB, Cameron AM. Acetaminophen-induced hepatic glycogen depletion and hyperglycemia in mice. *Biochem Pharmacol* 1983;32:1979-1988.
27. Newsome PN, Henderson NC, Nelson LJ, Dabos C, Filippi C, Bellamy C, Howie F, et al. Development of an invasively monitored porcine model of acetaminophen-induced acute liver failure. *BMC Gastroenterol* 2010;10:34.
28. Ghauri FY, McLean AE, Beales D, Wilson ID, Nicholson JK. Induction of 5-oxoprolinuria in the rat following chronic feeding with N-acetyl 4-aminophenol (paracetamol). *Biochem Pharmacol* 1993;46:953-957.
29. Yamazaki M, Miyake M, Sato H, Masutomi N, Tsutsui N, Adam KP, Alexander DC, et al. Perturbation of bile acid homeostasis is an early pathogenesis event of drug induced liver injury in rats. *Toxicol Appl Pharmacol* 2013;268:79-89.
30. Woolbright BL, McGill MR, Staggs VS, Winefield RD, Gholami P, Olyae M, Sharpe MR, et al. Glycodeoxycholic acid levels as prognostic biomarker in acetaminophen-induced acute liver failure patients. *Toxicol Sci* 2014;142:436-444.
31. Qiu Y, Benet LZ, Burlingame AL. Identification of the hepatic protein targets of reactive metabolites of acetaminophen in vivo in mice using two-dimensional gel electrophoresis and mass spectrometry. *J Biol Chem* 1998;273:17940-17953.

32. Cohen SD, Pumford NR, Khairallah EA, Boekelheide K, Pohl LR, Amouzadeh HR, Hinson JA. Selective protein covalent binding and target organ toxicity. *Toxicol Appl Pharmacol* 1997;143:1-12.
33. Zhang H, Gan J, Shu YZ, Humphreys WG. High-resolution mass spectrometry-based background subtraction for identifying protein modifications in a complex biological system: detection of acetaminophen-bound microsomal proteins including argininosuccinate synthetase. *Chem Res Toxicol* 2015;28:775-781.
34. Zhou L, McKenzie BA, Eccleston ED, Jr., Srivastava SP, Chen N, Erickson RR, Holtzman JL. The covalent binding of [<sup>14</sup>C]acetaminophen to mouse hepatic microsomal proteins: the specific binding to calreticulin and the two forms of the thiol:protein disulfide oxidoreductases. *Chem Res Toxicol* 1996;9:1176-1182.
35. Dietze EC, Schafer A, Omichinski JG, Nelson SD. Inactivation of glyceraldehyde-3-phosphate dehydrogenase by a reactive metabolite of acetaminophen and mass spectral characterization of an arylated active site peptide. *Chem Res Toxicol* 1997;10:1097-1103.
